# Supplementary material for: Contrasting response of soil microbiomes to long-term fertilization in various highland cropping systems
Source: PubMed Central journal article supplement (PMC10439144; doi:10.1038/s43705-023-00286-w), 2023-08-18
Supplement: 43705_2023_286_MOESM3_ESM.pdf [file 43705_2023_286_MOESM3_ESM.pdf]

# Supporting Information

**Table S1** PERMANOVA (adonis) analysis.

**Table S2** Pairwise adonis and anosim analysis between different groups.

**Table S3** Differential abundance analysis at ASV level

**Table S4** Differential abundance analysis at family level

**Fig. S1.** Rarefaction curves showing the saturation of ASV saturation.

**Fig. S2.** A priori model showing the direct and indirect effects on microbial activity and crop productivity after long-term fertilization.

**Fig. S3.** Wheat yields in different fertilization treatments in WC and GLR systems.

**Fig. S4.** Venn diagram showing the numbers of shared/unique bacterial ASVs.

**Fig. S5.** Core taxa with occupancy of 100%.

**Fig. S6.** Topological properties of bacterial co-occurrence network.

**Fig. S7.** Topological properties of bacterial co-occurrence network including node, edge number and degree.

**Fig. S8.** Linking core taxa to microbial activity and crop productivity in different cropping systems.

**Fig. S9.** Spearman's correlations between fertilization-responsive ASVs.

**Fig. S10.** Linear regressions between network properties (node, edge and degrees) and soil properties (SOC, TN and  $\text{NO}_3^-$ ) and bacterial  $\alpha$ -diversity (Observed ASVs).

**Fig. S11.** Linear regressions between soil properties (SOC,  $\text{NO}_3^-$  and OP) and soil bacterial community composition.

**Table S1** PERMANOVA (adonis) analysis showed the effects of fertilization under the same cropping system, or the effects of cropping system (CS) under the same fertilization treatment (FT).

|                                | CS             |       | FT             |       | CS×FT          |       |
|--------------------------------|----------------|-------|----------------|-------|----------------|-------|
|                                | R <sup>2</sup> | P     | R <sup>2</sup> | P     | R <sup>2</sup> | P     |
| <b>All</b>                     | 0.18           | 0.001 | 0.12           | 0.001 | 0.10           | 0.001 |
| <b>Fertilization effects</b>   |                |       |                |       |                |       |
| AC                             | /              | /     | 0.27           | 0.001 | /              | /     |
| WC                             | /              | /     | 0.24           | 0.001 | /              | /     |
| GLR                            | /              | /     | 0.27           | 0.001 | /              | /     |
| <b>Cropping system effects</b> |                |       |                |       |                |       |
| CK                             | 0.28           | 0.001 | /              | /     | /              | /     |
| P                              | 0.30           | 0.001 | /              | /     | /              | /     |
| NP                             | 0.16           | 0.015 | /              | /     | /              | /     |
| NPM                            | 0.40           | 0.001 | /              | /     | /              | /     |

Note: CS, cropping system; FT, Fertilization treatment; AC, continuous alfalfa system; WC, continuous wheat system; GLR, grain-legume rotation system; CK, unfertilized control; P, phosphorus; NP, nitrogen + phosphorus; NPM, nitrogen + phosphorus + manure.

**Table S2** Pairwise adonis and anosim analysis between different groups.

| Group | Process    | Adonis      |              | Anosim      |              |
|-------|------------|-------------|--------------|-------------|--------------|
|       |            | $R^2$       | $P$          | $R$         | $P$          |
| AC    | CK vs. P   | <b>0.17</b> | <b>0.002</b> | <b>0.32</b> | <b>0.007</b> |
|       | CK vs. NPM | <b>0.26</b> | <b>0.002</b> | <b>0.74</b> | <b>0.002</b> |
|       | P vs. NPM  | <b>0.22</b> | <b>0.003</b> | <b>0.56</b> | <b>0.003</b> |
| WC    | CK vs. P   | 0.08        | 0.653        | -0.02       | 0.471        |
|       | CK vs. NP  | 0.13        | 0.107        | 0.18        | 0.082        |
|       | CK vs. NPM | <b>0.28</b> | <b>0.005</b> | <b>0.74</b> | <b>0.005</b> |
|       | P vs. NP   | 0.11        | 0.143        | 0.10        | 0.143        |
|       | P vs. NPM  | <b>0.25</b> | <b>0.005</b> | <b>0.67</b> | <b>0.004</b> |
|       | NP vs. NPM | 0.18        | 0.005        | 0.33        | 0.002        |
| GLR   | CK vs. P   | 0.12        | 0.089        | 0.09        | 0.174        |
|       | CK vs. NP  | <b>0.23</b> | <b>0.005</b> | <b>0.54</b> | <b>0.008</b> |
|       | CK vs. NPM | <b>0.29</b> | <b>0.005</b> | <b>0.78</b> | <b>0.002</b> |
|       | P vs. NP   | <b>0.16</b> | <b>0.033</b> | <b>0.34</b> | <b>0.030</b> |
|       | P vs. NPM  | <b>0.22</b> | <b>0.005</b> | <b>0.60</b> | <b>0.004</b> |
|       | NP vs. NPM | <b>0.16</b> | <b>0.033</b> | <b>0.31</b> | <b>0.039</b> |
| CK    | AC vs. WC  | <b>0.29</b> | <b>0.003</b> | <b>0.86</b> | <b>0.003</b> |
|       | AC vs. GLR | <b>0.27</b> | <b>0.003</b> | <b>0.63</b> | <b>0.002</b> |
|       | WC vs. GLR | 0.12        | 0.150        | 0.12        | 0.115        |
| P     | AC vs. WC  | <b>0.32</b> | <b>0.002</b> | <b>0.93</b> | <b>0.005</b> |
|       | AC vs. GLR | <b>0.28</b> | <b>0.002</b> | <b>0.57</b> | <b>0.002</b> |
|       | WC vs. GLR | 0.13        | 0.085        | 0.16        | 0.079        |
| NP    | WC vs. GLR | <b>0.16</b> | <b>0.019</b> | <b>0.40</b> | <b>0.009</b> |
| NPM   | AC vs. WC  | <b>0.38</b> | <b>0.002</b> | <b>0.99</b> | <b>0.003</b> |
|       | AC vs. GLR | <b>0.38</b> | <b>0.002</b> | <b>0.88</b> | <b>0.003</b> |
|       | WC vs. GLR | <b>0.25</b> | <b>0.002</b> | <b>0.60</b> | <b>0.004</b> |

AC, continuous alfalfa system; WC, continuous wheat system; GLR, grain-legume rotation system; CK, unfertilized control; P, phosphorus; NP, nitrogen + phosphorus; NPM, nitrogen + phosphorus + manure

**Table S3.** Differential abundance analysis at ASV level between the unfertilized control and each fertilization treatment in AC, WC and GLR systems as determined by *DESeq2* package (FDR < 0.05)

**Table S4.** Differential abundance analysis at family level between the unfertilized control and each fertilization treatment in AC, WC and GLR systems as determined by *DESeq2* package (FDR < 0.05)

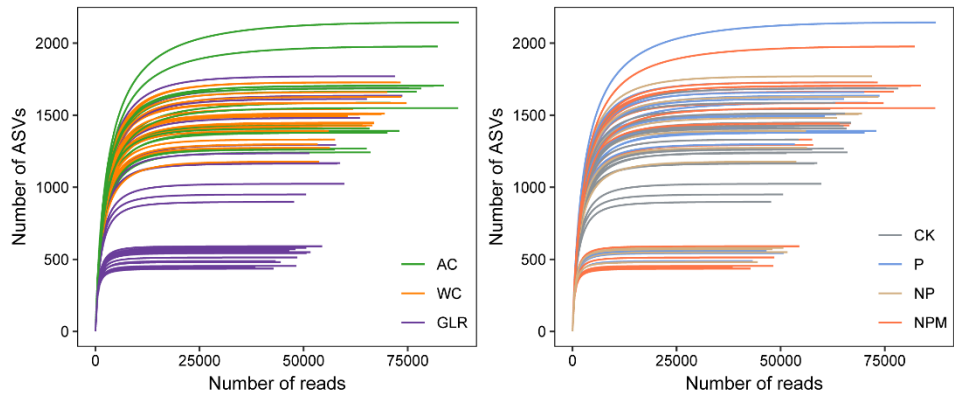

**Fig. S1.** Rarefaction curves based on the number of the observed ASVs, colored by cropping system **(a)** and fertilization **(b)**. Legend: AC, continuous alfalfa system; WC, continuous wheat system; GLR, grain-legume rotation system; CK, unfertilized control; P, phosphorus; NP, nitrogen + phosphorus; NPM, nitrogen + phosphorus + manure.

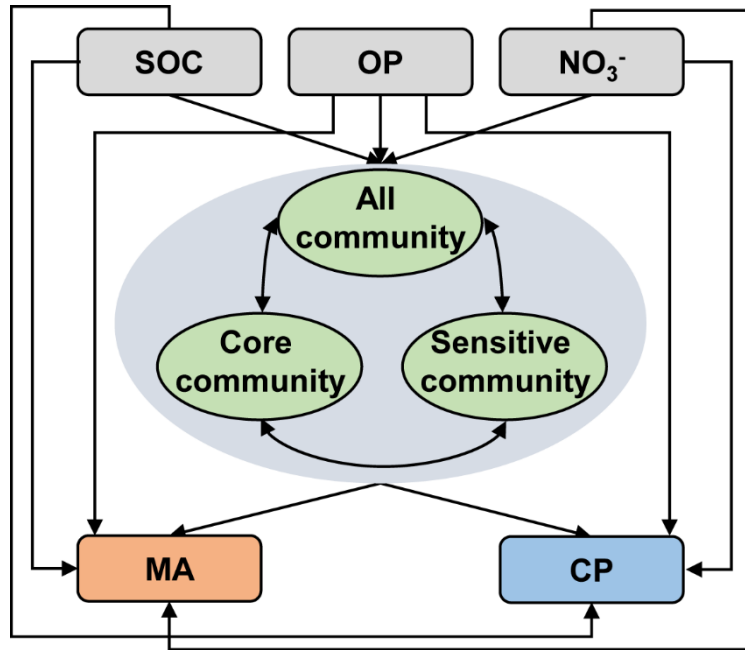

**Fig. S2.** A priori model showing the direct and indirect effects of the changes in soil properties (significant outputs from random forest) and composition of core or fertilization-sensitive community (first axis of principal coordinates analysis) on microbial activity and crop productivity after long-term fertilization. Legend: SOC, soil organic carbon; OP, available phosphorus;  $\text{NO}_3^-$ , nitrate; MA, microbial activity; CP, crop productivity. We hypothesized that changes in soil properties following long-term fertilization increased microbial activity and crop productivity by directly providing substrates for microbes and crops, and indirectly affecting bacterial community composition.

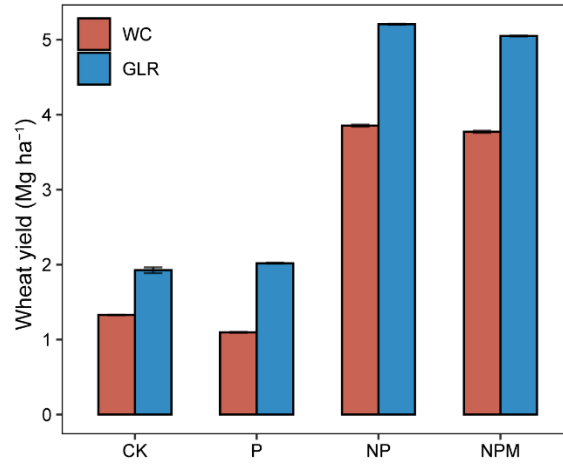

**Fig. S3.** Wheat yields in different fertilization treatments in WC and GLR systems. WC, continuous wheat system; GLR, grain-legume rotation system.

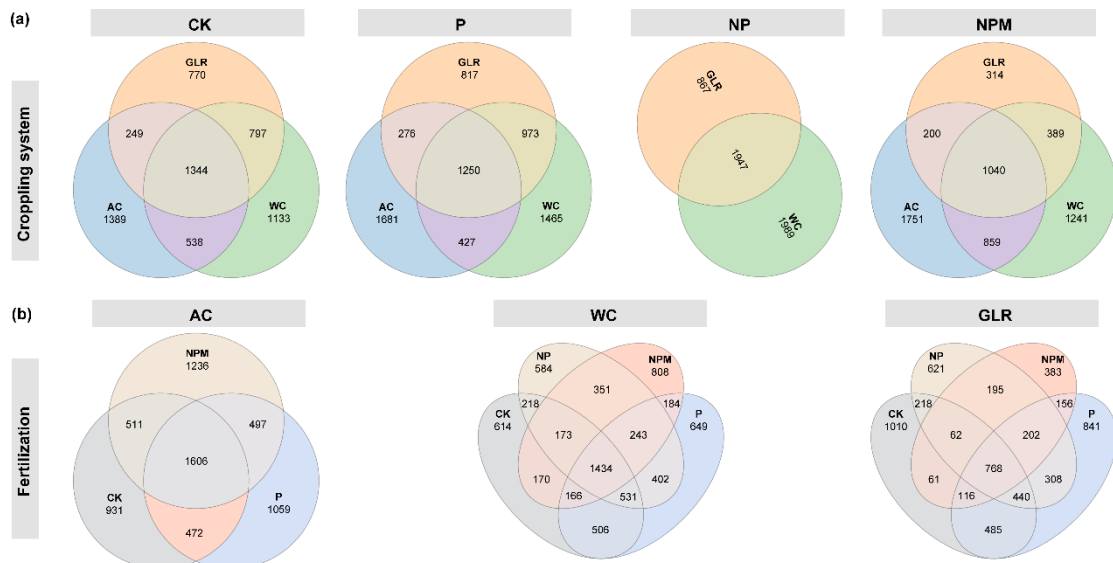

**Fig. S4.** Venn diagram showing the numbers of shared/unique bacterial ASVs among different cropping systems in each fertilization treatment **(a)** and among different fertilization treatments in each cropping system **(b)**. AC, continuous alfalfa system; WC, continuous wheat system; GLR, grain-legume rotation system; CK, unfertilized control; P, phosphorus; NP, nitrogen + phosphorus; NPM, nitrogen + phosphorus + manure.



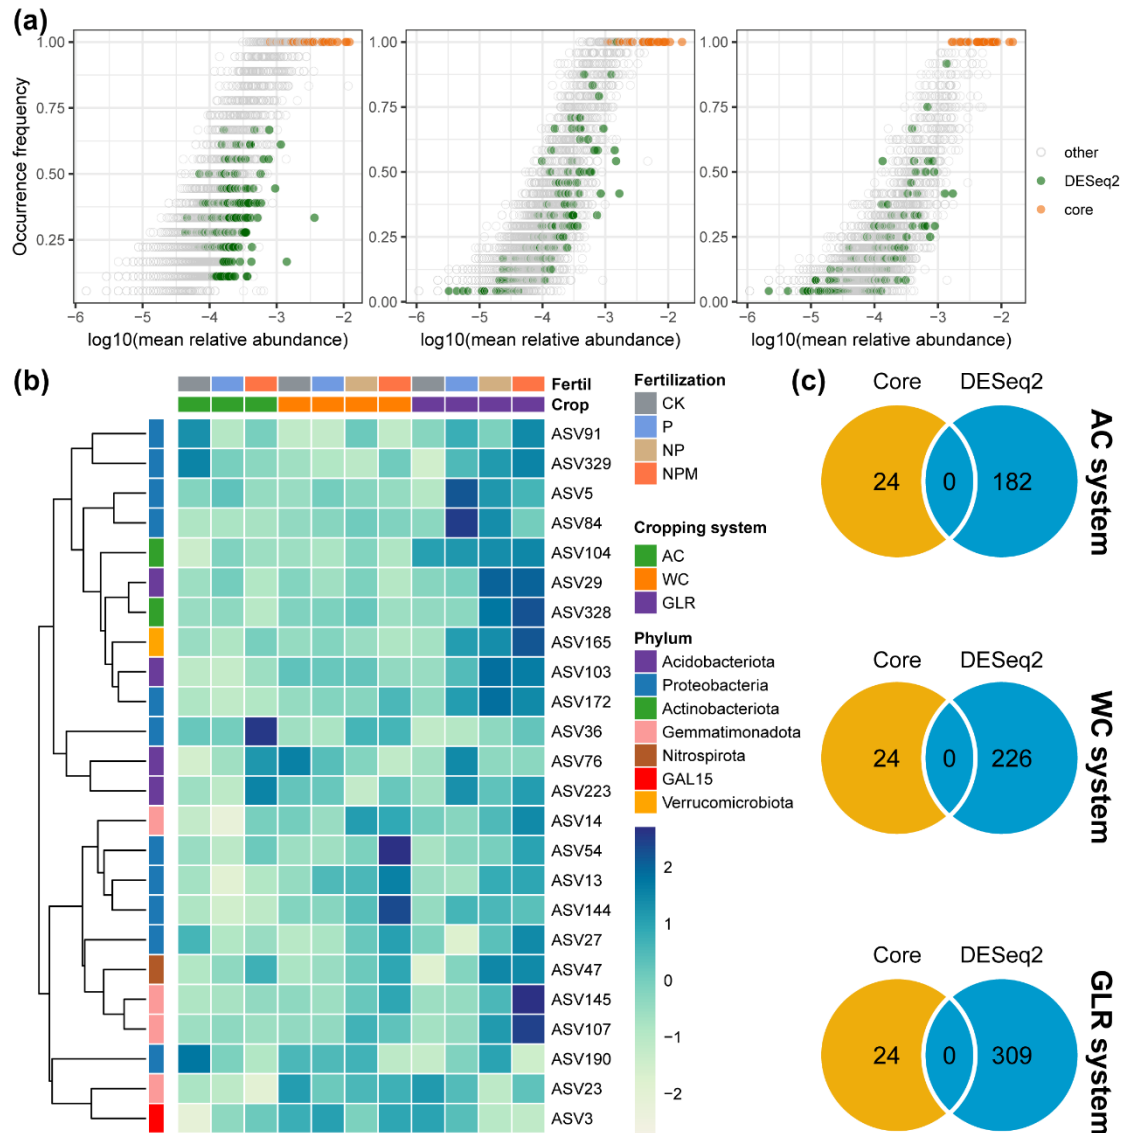

**Fig. S5.** Core taxa with occupancy of 100% were consistently detected in bacterial communities across all cropping systems and fertilization treatments. **(a)** Abundance-occupancy relationships of taxa. Taxa are colored for core, fertilization-sensitive, and other taxa. **(b)** Heatmaps showing the relative abundance of core ASVs. **(c)** Venn diagram showing the numbers of shared/unique bacterial ASVs among core taxa and fertilization-sensitive taxa (detached by *DESeq2* analysis) in AC, WC and GLR systems. Legend: AC, continuous alfalfa system; WC, continuous wheat system; GLR, grain-legume rotation system; CK, unfertilized control; P, phosphorus; NP, nitrogen + phosphorus; NPM, nitrogen + phosphorus + manure.

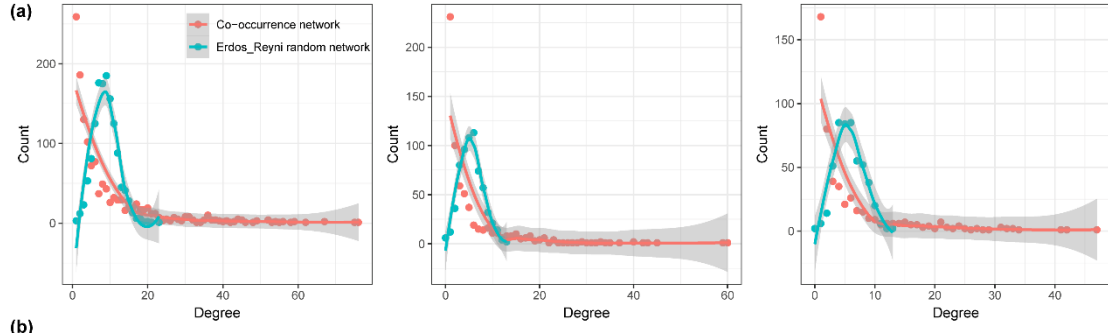

**(b)**

|            | Random network |               |             |               |               | Real network |       |            |          |         |
|------------|----------------|---------------|-------------|---------------|---------------|--------------|-------|------------|----------|---------|
|            | avgPath        | avgCC         | Modularity  | Diameter      | Density       | avgPath      | avgCC | Modularity | Diameter | Density |
| <b>AC</b>  | 3.56 ± 0.002   | 0.007 ± 0.001 | 0.300±0.003 | 6.120 ± 0.325 | 0.007 ± 0.000 | 3.21         | 0.38  | 0.61       | 10.78    | 0.007   |
| <b>WC</b>  | 3.97 ± 0.011   | 0.008 ± 0.002 | 0.409±0.005 | 7.783 ± 0.524 | 0.009 ± 0.000 | 3.49         | 0.37  | 0.65       | 10.39    | 0.008   |
| <b>GLR</b> | 3.73 ± 0.011   | 0.012 ± 0.002 | 0.395±0.006 | 7.212 ± 0.451 | 0.012 ± 0.000 | 3.28         | 0.43  | 0.65       | 8.94     | 0.012   |

**Fig. S6.** Topological properties of real and random bacterial co-occurrence network. **(a)** Power-law distribution pattern of the node degree. **(b)** Topological properties of bacterial real and random networks. avgPath, average path length; avgCC, average clustering coefficient; The random network of the same size was generated based on Erdős-Rényi model, and whose topological properties are calculated as the average value from 1000 Erdős-Rényi random networks.

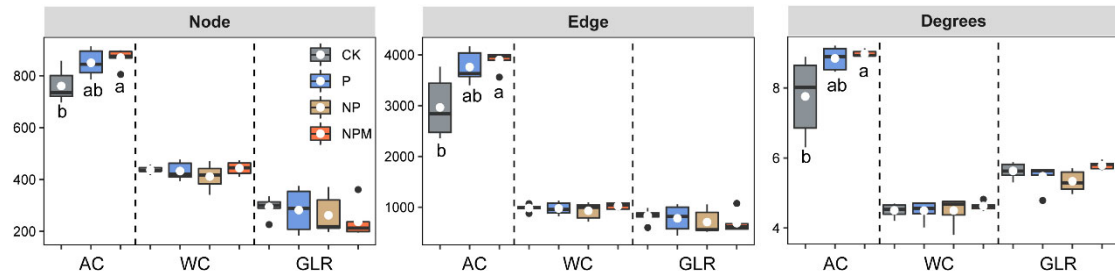

**Fig. S7.** Topological properties of bacterial co-occurrence network including node, edge number and degree as affected by cropping system and fertilization. Legend: AC, continuous alfalfa system; WC, continuous wheat system; GLR, grain-legume rotation system; P, phosphorus; NP, nitrogen + phosphorus; NPM, nitrogen + phosphorus + manure.

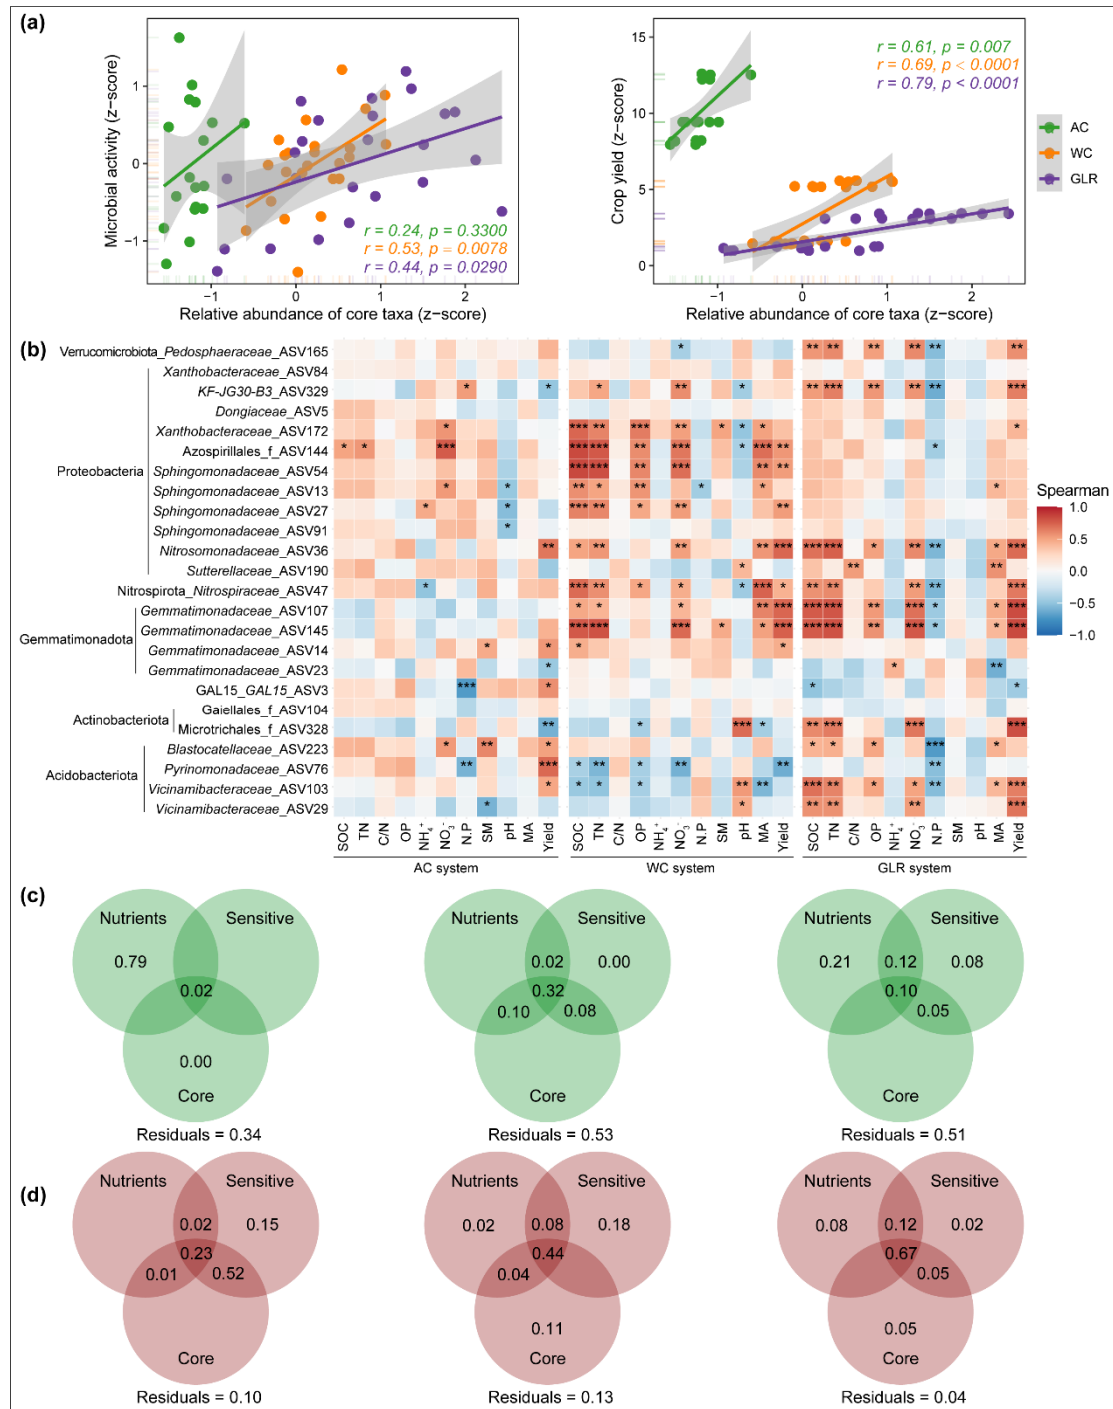

**Fig. S8.** Linking core taxa to microbial activity and crop productivity in different cropping systems. **(a)** The relationships between cumulative relative abundance of core taxa and microbial activity and crop productivity. **(b)** Spearman's correlations between each core taxa and soil properties, microbial activity and crop productivity. Variance partitioning analysis (VPA) showing the relative explanatory power of soil nutrients (SOC, NO<sub>3</sub><sup>-</sup> and OP), core and sensitive community composition (first axis of principal coordinates analysis) in determining microbial activity **(c)** and crop productivity **(d)**. Legend: AC, continuous alfalfa system; WC, continuous wheat system; GLR, grain-legume rotation system.

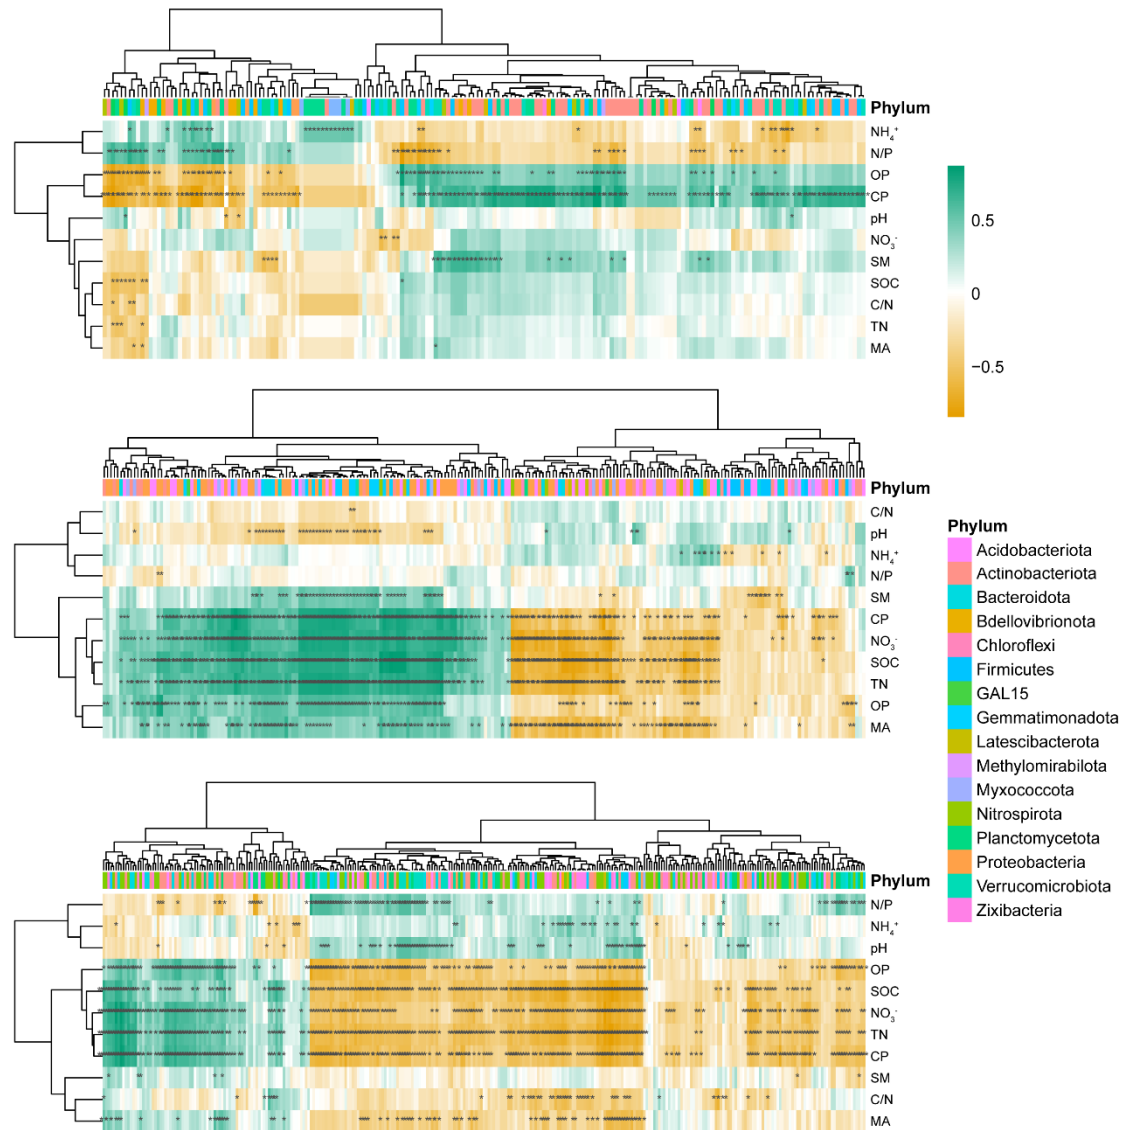

**Fig. S9.** Spearman's correlations between fertilization-responsive ASVs (detached by *DESeq2* analysis) and soil properties, microbial activities and crop productivity in AC (a), WC (b) and GLR (c) systems. Legend: AC, continuous alfalfa system; WC, continuous wheat system; GLR, grain-legume rotation system; SOC, soil organic carbon; TN, total nitrogen; C/N, ratio of carbon to nitrogen; OP, available phosphorus;  $\text{NH}_4^+$ , ammonium;  $\text{NO}_3^-$ , nitrate; N/P, ratio of mineral nitrogen to available phosphorus; SM, soil moisture; pH, soil pH ( $\text{H}_2\text{O}$ ); MA, microbial activity; CP, crop productivity.

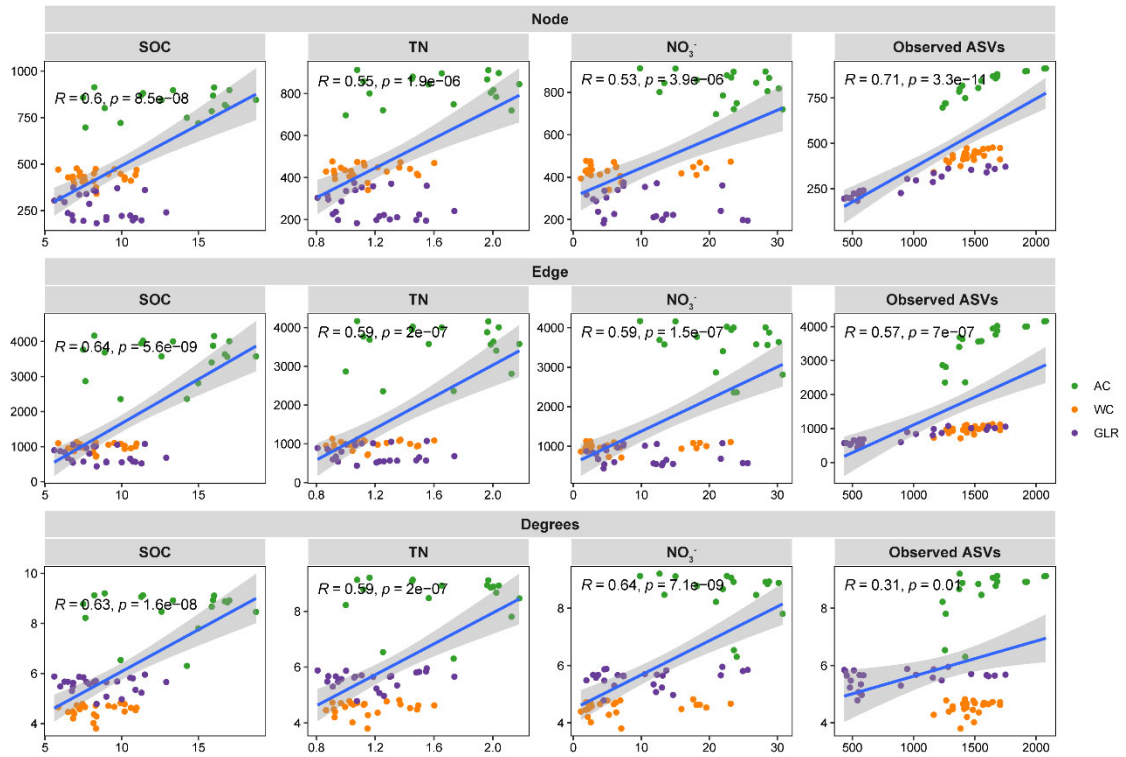

**Fig. S10.** Linear regressions between network properties (node, edge and degrees) and soil properties (SOC, TN and  $\text{NO}_3^-$ ) and bacterial  $\alpha$ -diversity (Observed ASVs). Legend: AC, continuous alfalfa system; WC, continuous wheat system; GLR, grain-legume rotation system; SOC, soil organic carbon; TN, total nitrogen;  $\text{NO}_3^-$ , nitrate.

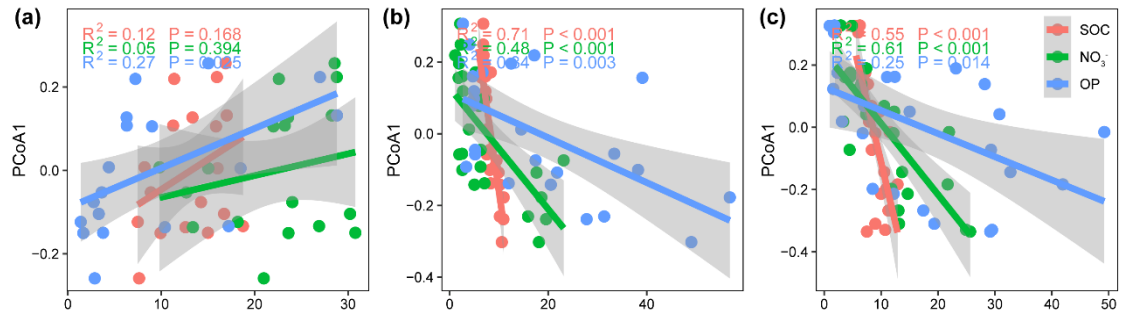

**Fig. S11.** Linear regressions between soil properties (SOC, NO<sub>3</sub><sup>-</sup> and OP) and soil bacterial community composition (first axis of principal coordinates analysis) in AC **(a)**, WC **(b)** and GLR **(c)** systems. Legend: SOC, soil organic carbon; OP, available phosphorus; NO<sub>3</sub><sup>-</sup>, nitrate.
